# Supplementary material
Source: PubMed Central journal article supplement (PMC4414402)
Supplement: NIHMS683710-supplement-Supp_Material.pdf [file NIHMS683710-supplement-Supp_Material.pdf]

**A role for the FtsQLB complex in cytokinetic ring activation revealed by an *ftsL* allele that accelerates division**

Mary-Jane Tsang<sup>1</sup> and Thomas G. Bernhardt<sup>1\*</sup>

<sup>1</sup>Department of Microbiology and Immunobiology  
Harvard Medical School  
Boston, MA 02115

\*To whom correspondence should be addressed.  
Thomas G. Bernhardt, Ph.D.  
Harvard Medical School  
Department of Microbiology and Immunobiology  
Boston, Massachusetts 02115  
e-mail: [thomas\\_bernhardt@hms.harvard.edu](mailto:thomas_bernhardt@hms.harvard.edu)

**Running title:** FtsL and divisome activation

**Keywords:** cell division/divisome/morphogenesis/cytokinesis/bacteriolysis

## FIGURE LEGENDS

**Fig. S1 FtsL\* phenotype not due to protein stabilization.** (A) Overnight cultures of TB28 [*WT*] or MT10 [*ftsL\**] cells were diluted in fresh LB or M9 maltose medium and grown at 37°C until  $OD_{600} \sim 0.5-0.7$  when the cells were harvested for whole-cell extract preparation. Proteins in the resulting extracts were separated by SDS-PAGE, transferred to PVDF, and FtsL was detected with anti-FtsL antisera. (B) TB28 or MT10 cells with expressing either the empty vector (pBAD33), FtsL(WT) (pMT27) or FtsL(E88K) (pMT28) were grown overnight in LB broth at 30°C. Following normalization for cell density ( $OD_{600} = 2$ ), the resulting cultures were serially diluted ( $10^{-1}$  to  $10^{-6}$ ), and 5  $\mu$ l of each dilution was spotted on the indicated medium. Plates were incubated overnight at the indicated temperature and photographed.

**Fig. S2. Localization of GFP-FtsL\*.** Overnight cultures of MT10 [*ftsL\**] containing the integrated GFP fusion constructs (A, B) *attHKMT35* [*P<sub>lac</sub>::gfp-ftsL(wt)*] or (C, D) *attHKMT36* [*P<sub>lac</sub>::gfp-ftsL\**] were diluted in 0.5xLB-0N broth and grown to mid-log at 30°C. They were then diluted to a starting  $OD_{600} \sim 0.02$  in fresh 0.5xLB-0N supplemented with 25  $\mu$ M IPTG and grown at 42°C to an  $OD_{600}$  of 0.3 - 0.5 before they were visualized on 2% agarose pads with DIC (A, C) and GFP (B, D) optics. Bar = 4 $\mu$ m.

A

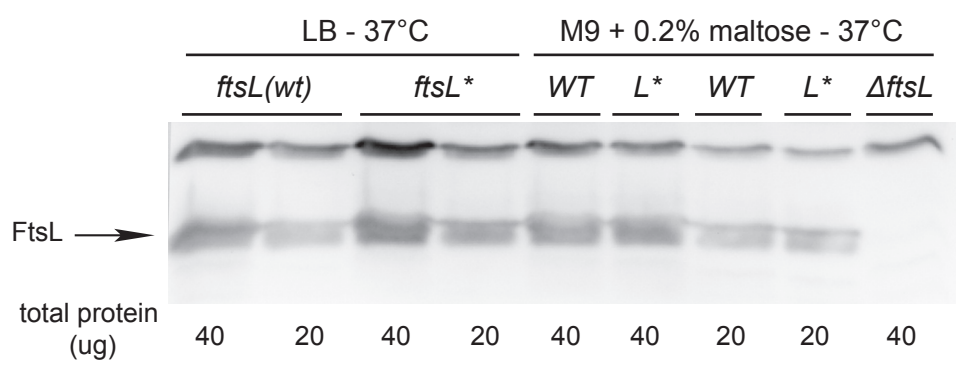

B

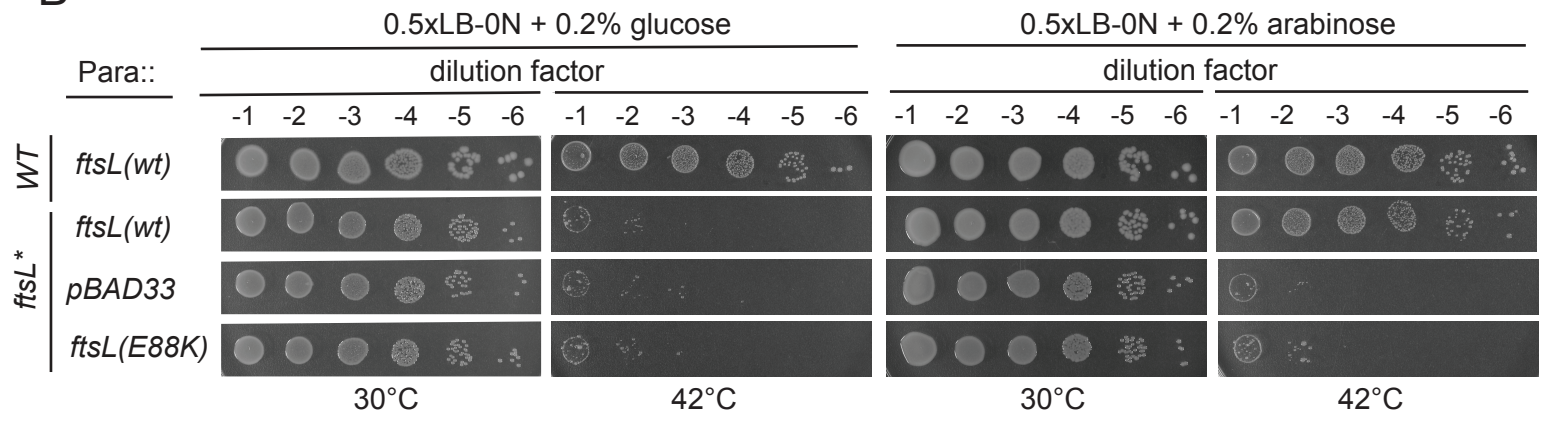

Figure S1

MT10 [*ftsL*<sup>\*</sup>]

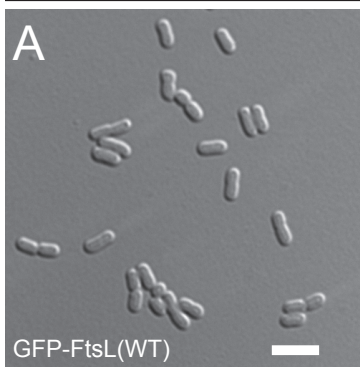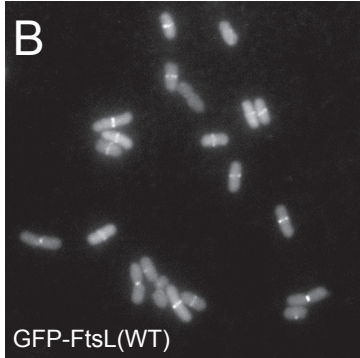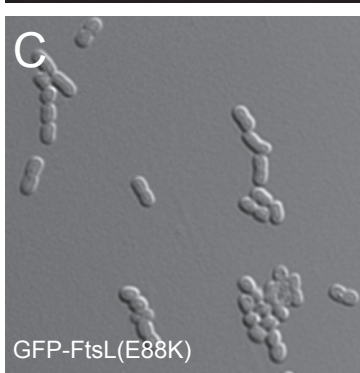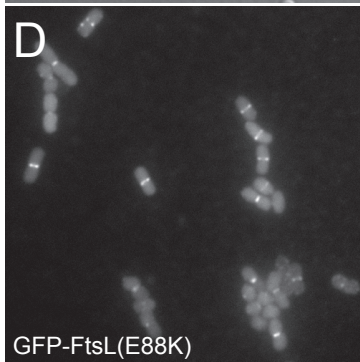

Figure S2

## Plasmid Construction

Plasmids used in this study are listed below. PCR was performed using KOD polymerase (Novagen) for cloning purposes and *Taq* DNA polymerase (NEB) for diagnostic purposes, both according to the manufacturer's instructions. Unless otherwise indicated, MG1655 chromosomal DNA was used as the template. Restriction sites for use in plasmid constructions are bold, italicized and underlined in the primer sequences given below. Plasmid DNA and PCR fragments were purified using the Zyppy plasmid miniprep kit (Zymo Research) or the Qiaquick PCR purification kit (Qiagen), respectively.

### pMM61

The plasmid pMM61 [*attHK022 tetA tetR lacI<sup>q</sup> P<sub>lac</sub>::gfp-slmA*] was constructed as follows. The primers 5'-GCAT **AGATCT**GCACATTTCCCGAAAAGTG-3' and 5'-GACGAAAGTGATTGCGCCTACC-3' were used to amplify *P<sub>lac</sub>::gfp-slmA* from pTB99 [*attHK022 bla lacI<sup>q</sup> P<sub>lac</sub>::gfp-slmA*] (Bernhardt and de Boer, 2005). The resulting PCR product was purified, digested with BglIII and HindIII and ligated with similarly digested pDY75 [*attHK022 tetA tetR araC P<sub>ara</sub>::<sup>ss</sup>dsbA-amiB*] (Peters *et al.*, 2011).

### pMT15

The plasmid pMT15 [*attHK022 tetA tetR lacI<sup>q</sup> P<sub>lac</sub>::ftsL*] was constructed as follows. The primers 5'-GTCA **TCTAGACT**GCGTATTGCAGAGAGGACGAATGCATG-3' and 5'-GTCA **AAGCTT**GCGTCGCGTTTATCCTTATTTTTGC-3' were used to amplify *ftsL* from genomic DNA. The resulting PCR produced was purified, digested with XbaI and HindIII

and ligated with similarly digested pNP20 [*attHK022 tetA tetR lacI<sup>q</sup> P<sub>lac</sub>::nlpD-mCherry*] (Peters *et al.*, 2011).

#### pMT16

The plasmid pMT16 [*attHK022 tetA tetR lacI<sup>q</sup> P<sub>lac</sub>::ftsL(E88K)*] was constructed as follows. The primers 5'-GTCA**TCTAG**ACTGCGTATTGCAGAGAGGACGAATGCATG-3' / 5'-GAGCGCATT**CTTTT**CAAGGATCAGGTTGCGC-3' and 5'-GATCCTTGAAA**AAG**AATGCGCTCGGCGACCATAG-3'/5'-GTCA**AAGCTT**GCGTCGCGTTTATCCTTATTTTTGC-3' were used in overlap extension PCR to amplify the *ftsL* gene from genomic DNA and to perform site directed mutagenesis to create the E88K mutation in the *ftsL* gene. The resulting PCR produce was purified, digested with XbaI and HindIII and ligated with similarly digested pNP20 [*attHK022 tetA tetR lacI<sup>q</sup> P<sub>lac</sub>::nlpD-mCherry*].

#### pMT17

The plasmid pMT17 [*cat mobRP4 sacB mraZ-mraW-ftsL(E88K)-ftsI*] was constructed as follows. The primers 5'-GTCAG**GAGCTC**GAGTCATTTTAAAACGGTGATGACGATGAGG-3'/5'-GAGCGCATT**CTTTT**CAAGGATCAGGTTGCGC-3' and 5'-GATCCTTGAAA**AAG**AATGCGCTCGGCGACCATAG-3'/5'-GTCA**TCTAG**AGCAAATTACGATCTGCCACCTGTCC-3' were used in overlap extension PCR to amplify a 4kb region including the *ftsL* gene from genomic DNA and to perform site directed mutagenesis to create the E88K mutation in the *ftsL* gene. The

resulting PCR produce was purified, digested with SacI and XbaI and ligated with similarly digested pDS132 [*cat mobRP4 sacB*] (Philippe *et al.*, 2004).

### pMT20

The plasmid pMT20 [*attHK022 tetA tetR lacI<sup>q</sup> P<sub>lac</sub>::nlpD*] was constructed as follows.

The *nlpD* containing XbaI/HindIII fragment of pTD23 [*attHK022 bla lacI<sup>q</sup> P<sub>lac</sub>::nlpD*] was used to replace the corresponding fragment of pNP20 [*attHK022 tetA tetR lacI<sup>q</sup> P<sub>lac</sub>::nlpD-mCherry*].

### pMT23

The plasmid pMT23 [*tetA tetR lacI<sup>q</sup> P<sub>lac</sub>::nlpD*] was constructed as follows. The primers

5'-GCT **GCGGCCGC**TTTAGATTGATTTAAACTTC-3' and 5'-

GCT **AAGCTT**AAAAAACCCGCCCGGCGGGTTTTTTTATCACCGATACGCGAGCGA

AC were used to amplify the ColE1 origin from pMLB1113 [*bla lacI<sup>q</sup> P<sub>lac</sub>::lacZ*] (de Boer *et al.*, 1989) and include the tL17 transcription termination sequence. The resulting PCR product was purified, digested with NotI and HindIII and ligated with similarly digested pMT20 [*attHK022 tetA tetR lacI<sup>q</sup> P<sub>lac</sub>::nlpD*].

### pMT27

The plasmid pMT27 [*cat araC P<sub>ara</sub>::ftsL*] was constructed as follows. The *ftsL* containing

XbaI/HindIII fragment of pMT15 [*attHK022 tetA tetR lacI<sup>q</sup> P<sub>lac</sub>::ftsL*] was used to replace

the corresponding fragment of pDY31 [*cat araC P<sub>ara</sub>::amiB*](Yang *et al.*, 2012).

### pMT28

The plasmid pMT28 [*cat araC P<sub>ara</sub>::ftsL(E88K)*] was constructed as follows. The *ftsL(E88K)* containing XbaI/HindIII fragment of pMT16 [*attHK022 tetA tetR lacI<sup>q</sup> P<sub>lac</sub>::ftsL(E88K)*] was used to replace the corresponding fragment of pDY31 [*cat araC P<sub>ara</sub>::amiB*](Yang *et al.*, 2012).

### pMT35

The plasmid pMT35 [*attHK022 tetA tetR lacI<sup>q</sup> P<sub>lac</sub>::gfp-ftsL*] was constructed as follows. The primers 5'-GTCA**GGATCC**ATCAGCAGAGTGACAGAAGCTC-3' and 5'-GTCA**AAGCTT**GCGTCGCGTTTATCCTTATTTTTGC-3' were used to amplify *ftsL* from pMT15 [*attHK022 tetA tetR lacI<sup>q</sup> P<sub>lac</sub>::ftsL*]. The resulting PCR produce was purified, digested with BamHI and HindIII and ligated with similarly digested pMM61 [*attHK022 tetA tetR lacI<sup>q</sup> P<sub>lac</sub>::gfp-slmA*].

### pMT36

The plasmid pMT36 [*attHK022 tetA tetR lacI<sup>q</sup> P<sub>lac</sub>::gfp-ftsL(E88K)*] was constructed as follows. The primers 5'-GTCA**GGATCC**ATCAGCAGAGTGACAGAAGCTC-3' and 5'-GTCA**AAGCTT**GCGTCGCGTTTATCCTTATTTTTGC-3' were used to amplify *ftsL(E88K)* from pMT16 [*attHK022 tetA tetR lacI<sup>q</sup> P<sub>lac</sub>::ftsL(E88K)*]. The resulting PCR produce was purified, digested with BamHI and HindIII and ligated with similarly digested pMM61 [*attHK022 tetA tetR lacI<sup>q</sup> P<sub>lac</sub>::gfp-slmA*].

### pMT74



The plasmid pMT74 [*tetA tetR lacI<sup>q</sup> P<sub>lac</sub>::sulA*] was constructed as follows. The primers 5'-CGTA**CATATG**TACACTTCAGGCTATGC-3' and 5'-CGTA**AAGCTT**AATGATACAAATTAGAGTG-3' were used to amplify *sulA* from genomic DNA. The resulting PCR product was purified, digested with NdeI and HindIII and ligated downstream of the *tac* promoter in a derivative of pTB85 (Bernhardt and de Boer, 2005) that also contained the *phi10* ribosome binding site, generating pHc705 [*bla lacI<sup>q</sup> P<sub>tac</sub>::sulA*]. The *sulA* containing XbaI/HindIII fragment of pHc705 was then used to replace the corresponding fragment of pMT23 [*tetA tetR lacI<sup>q</sup> P<sub>lac</sub>::nlpD*] to make pMT74.

#### pMT117

The plasmid pMT117 [*tetA tetR lacI<sup>q</sup> P<sub>lac</sub>::ftsK*] was constructed as follows. The primers 5'-GGGGAATTGTGAGCGGATAACAATTCCCC**TCTAGA**GAAAAGCCTGTAACCTGGAGAGCC-3' and 5'-GTCAG**GTCGACT**TAGTCAAACGGCGGTGGGG-3' were used to amplify *ftsK* from pTB66. The resulting PCR product was purified, digested with XbaI and Sall and ligated with similarly digested pNP20 [*attHK022 tetA tetR lacI<sup>q</sup> P<sub>lac</sub>::nlpD-mCherry*].

#### pNP102

The plasmid pNP102 [*attHK022 tetA tetR lacI<sup>q</sup> P<sub>lac</sub>::ftsN*] was constructed as follows. The primers 5'-CAGC**TCTAGAC**ATGGCGGGCTGACGA-3' and 5'-CAGC**AAGCTT**TTCATCAACCCCGGCGGCGAGCC-3' were used to amplify *ftsN* from genomic DNA. The resulting PCR product was purified, digested with XbaI and HindIII

and ligated with similarly digested pMM60 [*attHK022 tetA tetR lacI<sup>q</sup> P<sub>lac</sub>::ycfM-sfgfp*] (Peters *et al.*, 2011).

#### pTB66

The plasmid pTB66 [*bla lacI<sup>q</sup> P<sub>lac</sub>::ftsK*] was constructed as follows. The *ftsK* gene was amplified from genomic DNA, digested with EcoRI and HindIII and ligated with similarly digested pRC7 (de Boer *et al.*, 1989).

#### pTD17

The plasmid pTD17 [*attHK022 bla lacI<sup>q</sup> gfp*] was constructed as follows. The primers 5'-TTAGGCACCCCAGGCTTTACAC-3' and 5'-

GTCAG**GT**CGAC****TTATTTGTATAGTTCATCCATGCCATGTGTAATC-3' were used to amplify *gfp* from pTB183 [*attHK022 bla lacI<sup>q</sup> P<sub>lac</sub>::gfp-zapA*] (Bendezú and de Boer, 2008). The resulting PCR product was purified, digested with XbaI and Sall and ligated into similarly digested pTD16 [*attHK022 bla lacI<sup>q</sup>*] (Uehara *et al.*, 2009).

#### pTD19

The plasmid pTD19 [*attHK022 bla lacI<sup>q</sup> P<sub>lac</sub>::gfp*] was constructed as follows. The primers 5'-

AATTCAATTGTGAGCGCTCACAATTCAAGCACCCCAGGCTTTACTTTATGCTTCC  
GGCTCGTATAATGTGTGGAATTGTGAGCGGATAACAATTCAT-3' and 5'-  
CTAGATGAAATTGTTATCCGCTCACAATTCCACACATTATACGAGCCGGAAGCATAAA  
GTGTAAAGCCTGGGGTGCTTGAATTGTGAGCGCTCACAATTG-3' were annealed

together to create a fragment containing the *Plac(UV5)* promoter, which was then ligated into pTD17 [*attHK022 bla lacI<sup>q</sup> gfp*] digested with EcoRI and XbaI.

#### pTD22

The plasmid pTD22 [*attHK022 bla lacI<sup>q</sup> P<sub>lac</sub>::zipA-gfp*] was constructed as follows. The *zipA-gfp* containing XbaI/HindIII fragment of pTB98 [*attHK022 bla lacI<sup>q</sup> P<sub>lac</sub>::zipA-gfp*] (Bendezú *et al.*, 2009) was used to replace the corresponding fragment of pTD19 [*attHK022 bla lacI<sup>q</sup> P<sub>lac</sub>::gfp*].

#### pTD23

The plasmid pTD23 [*attHK022 bla lacI<sup>q</sup> P<sub>lac</sub>::nlpD*] was constructed as follows. The primers 5'-GTACCATATGAGCGCGGGAAGCCCA-3' and 5'-GTCAAAGCTTCCGCCGATTTATCGCTGC-3' were used to amplify *nlpD* from genomic DNA. The resulting PCR product was purified, digested with NdeI and HindIII and ligated into similarly digested pTD22 [*attHK022 bla lacI<sup>q</sup> P<sub>lac</sub>::zipA-gfp*].

**Table S1. Strains used in this study.**

| <b>Strain</b> | <b>Genotype<sup>a</sup></b>                                                                      | <b>Source/Reference<sup>b</sup></b> |
|---------------|--------------------------------------------------------------------------------------------------|-------------------------------------|
| DH5α          | <i>F- hsdR17 deoR recA1 endA1 phoA supE44 thi-1 gyrA96 relA1 Δ(lacZYA-argF)U169 φ80dlacZΔM15</i> | Gibco BRL                           |
| MG1655        | <i>rph-1 ilvG rfb-50</i>                                                                         | (Guyer <i>et al.</i> , 1981)        |
| TB28          | MG1655 <i>ΔlacZYA::frt</i>                                                                       | (Bernhardt and de Boer, 2004)       |
| CH2           | <i>dadR trpE trpA tna ftsA(0) recA::Tn10</i>                                                     | (Hale and de Boer, 1999)            |
| CH34          | TB28 <i>ΔftsN::Kan<sup>R</sup></i>                                                               | (Gerding <i>et al.</i> , 2009)      |
| CH43          | TB28 <i>leu::Tn10</i>                                                                            | from de Boer lab                    |
| HC261         | TB28 <i>zapA-GFP Cm<sup>R</sup></i>                                                              | (Peters <i>et al.</i> , 2011)       |
| MT10          | TB28 <i>ftsL(E88K)</i>                                                                           | Allelic replacement                 |
| MT13          | TB28 <i>leu::Tn10 ftsL(E88K)</i>                                                                 | P1(CH43) x MT10                     |
| MT23          | TB28 <i>ftsL(E88K) proQ::MarTn</i>                                                               | This Study<br>(Isolated Suppressor) |
| MT24          | TB28 <i>ftsL(E88K) ftsP::MarTn</i>                                                               | This Study<br>(Isolated Suppressor) |
| MT28          | TB28 <i>ftsL(E88K) ftsN::Tn5-3</i>                                                               | This Study<br>(Isolated Suppressor) |
| MT29          | TB28 <i>ftsL(E88K) ddIB::Tn5-2</i>                                                               | This Study<br>(Isolated Suppressor) |
| MT30          | TB28 <i>ftsL(E88K) ftsK::Tn5-1</i>                                                               | This Study<br>(Isolated Suppressor) |
| MT31          | TB28 <i>ftsL(E88K) ftsN::Tn5-1</i>                                                               | This Study<br>(Isolated Suppressor) |
| MT32          | TB28 <i>ftsL(E88K) murD::Tn5</i>                                                                 | This Study<br>(Isolated Suppressor) |
| MT35          | TB28 <i>ftsL(E88K) dedD::Tn5</i>                                                                 | This Study<br>(Isolated Suppressor) |

| Strain | Genotype <sup>a</sup>                                           | Source/Reference <sup>b</sup> |
|--------|-----------------------------------------------------------------|-------------------------------|
| MT38   | TB28 <i>ftsK::Tn5-1</i>                                         | P1(MT30) x TB28               |
| MT39   | TB28 <i>ftsN::Tn5-1</i>                                         | P1(MT31) x TB28               |
| MT70   | TB28 $\Delta$ <i>ftsN::Kan<sup>R</sup></i>                      | P1(CH34) x TB28               |
| MT71   | TB28 <i>ftsL(E88K) <math>\Delta</math>ftsN::Kan<sup>R</sup></i> | P1(CH34) x MT10               |
| MT75   | TB28 $\Delta$ <i>ftsK::Kan<sup>R</sup></i>                      | $\lambda$ Red                 |
| MT76   | TB28 <i>ftsL(E88K) <math>\Delta</math>ftsK::Kan<sup>R</sup></i> | P1(MT75) x MT10               |
| MT78   | TB28 <i>zapA-GFP frt leu::Tn10 ftsA(0)</i>                      | P1(MT13) x NP180              |
| MT79   | TB28 <i>zapA-GFP frt leu::Tn10 ftsL(E88K) ftsA(0)</i>           | P1(MT13) x NP180              |
| MT90   | TB28 <i>ftsL(E88K) zapA-GFP Cm<sup>R</sup></i>                  | P1 (HC261) x MT10             |
| MT102  | TB28 <i>ftsL(E88K) zapA-mCherry Cm<sup>R</sup></i>              | P1 (TU211) x MT10             |
| NP1    | TB28 <i>zapA-GFP frt</i>                                        | (Peters <i>et al.</i> , 2011) |
| NP179  | TB28 <i>zapA-GFP frt leu::Tn10</i>                              | P1(CH43) x NP1                |
| NP180  | TB28 <i>zapA-GFP frt ftsA(0)</i>                                | P1(CH2) x NP179               |
| TU211  | TB28 <i>zapA-mCherry Cm<sup>R</sup></i>                         | Peters et al. 2011            |

<sup>a</sup> The Kan<sup>R</sup> and Cm<sup>R</sup> cassettes are flanked by *frt* sites for removal by FLP recombinase. An *frt* scar remains following removal of the cassette using FLP expressed from pCP20.

<sup>b</sup> Strain constructions by P1 transduction are described using the shorthand: P1(donor) x recipient. Transductants were selected on Kan, Tet, Cm or minimal medium with no casamino acids plates where appropriate. Allelic replacement and  $\lambda$ Rec indicates strains were constructed by allelic exchange and recombineering respectively (see Experimental Procedures for details).

**Table S2. Plasmids used in this study.**

| Plasmid | Genotype <sup>a</sup>                                                      | Origin     | Source or Reference             |
|---------|----------------------------------------------------------------------------|------------|---------------------------------|
| pDB355  | <i>aadA cl857(ts) P<sub>λR</sub>::ftsA</i>                                 | pSC101     | (Hale and de Boer, 1999)        |
| pDS132  | <i>cat mobRP4 sacB</i>                                                     | R6K        | (Philippe <i>et al.</i> , 2004) |
| pDY31   | <i>cat araC P<sub>ara</sub>::amiB</i>                                      | pACYC/p15A | (Yang <i>et al.</i> , 2012)     |
| pKD46   | <i>bla repA101(ts) araC P<sub>ara</sub>::γ-β-exo</i>                       | pSC101     | (Datsenko and Wanner, 2000)     |
| pMG20   | <i>cat araC P<sub>ara</sub>::sstorA-bfp-ftsN(71-105)</i>                   | pACYC/p15A | (Gerding <i>et al.</i> , 2009)  |
| pMM61   | <i>attHK022 tetA tetR lacI<sup>q</sup> P<sub>lac</sub>::gfp-slmA</i>       | R6K        | This study                      |
| pMT15   | <i>attHK022 tetA tetR lacI<sup>q</sup> P<sub>lac</sub>::ftsL</i>           | R6K        | This study                      |
| pMT16   | <i>attHK022 tetA tetR lacI<sup>q</sup> P<sub>lac</sub>::ftsL(E88K)</i>     | R6K        | This study                      |
| pMT17   | <i>cat mobRP4 sacB mraZ-mraW-ftsL(E88K)-ftsI</i>                           | R6K        | This study                      |
| pMT23   | <i>tetA tetR lacI<sup>q</sup> P<sub>lac</sub>::nlpD</i>                    | R6K        | This study                      |
| pMT27   | <i>cat araC P<sub>ara</sub>::ftsL</i>                                      | pACYC/p15A | This study                      |
| pMT28   | <i>cat araC P<sub>ara</sub>::ftsL(E88K)</i>                                | pACYC/p15A | This study                      |
| pMT35   | <i>attHK022 tetA tetR lacI<sup>q</sup> P<sub>lac</sub>::gfp-ftsL</i>       | R6K        | This study                      |
| pMT36   | <i>attHK022 tetA tetR lacI<sup>q</sup> P<sub>lac</sub>::gfp-ftsL(E88K)</i> | R6K        | This study                      |
| pMT74   | <i>tetA tetR lacI<sup>q</sup> P<sub>lac</sub>::sulA</i>                    | pBR/ColE1  | This study                      |
| pMT117  | <i>tetA tetR lacI<sup>q</sup> P<sub>lac</sub>::ftsK</i>                    | R6K        | This study                      |
| pNP20   | <i>attHK022 tetA tetR lacI<sup>q</sup> P<sub>lac</sub>::nlpD-mCherry</i>   | R6K        | peters 2011                     |
| pNP102  | <i>attHK022 tetA tetR lacI<sup>q</sup> P<sub>lac</sub>::ftsN</i>           | R6K        | This study                      |
| pTB102  | <i>cat repA(ts) cl857(ts) P<sub>λR</sub>::int(HK022)</i>                   | pSC101     | (Bernhardt and de Boer, 2005)   |

<sup>a</sup> P<sub>λR</sub>, P<sub>lac</sub>, and P<sub>ara</sub> indicate the phage λR, lactose, and arabinose promoters, respectively.

## REFERENCES

- Bendezú, F.O., and de Boer, P.A.J. (2008) Conditional lethality, division defects, membrane involution, and endocytosis in mre and mrd shape mutants of *Escherichia coli*. *J Bacteriol* **190**: 1792–1811.
- Bendezú, F.O., Hale, C.A., Bernhardt, T.G., and de Boer, P.A.J. (2009) RodZ (YfgA) is required for proper assembly of the MreB actin cytoskeleton and cell shape in *E. coli*. *EMBO J* **28**: 193–204.
- Bernhardt, T.G., and de Boer, P.A.J. (2004) Screening for synthetic lethal mutants in *Escherichia coli* and identification of EnvC (YibP) as a periplasmic septal ring factor with murein hydrolase activity. *Mol Microbiol* **52**: 1255–1269.
- Bernhardt, T.G., and de Boer, P.A.J. (2005) SlmA, a nucleoid-associated, FtsZ binding protein required for blocking septal ring assembly over Chromosomes in *E. coli*. *Mol Cell* **18**: 555–564.
- Datsenko, K.A., and Wanner, B.L. (2000) One-step inactivation of chromosomal genes in *Escherichia coli* K-12 using PCR products. *Proc Natl Acad Sci USA* **97**: 6640–6645.
- de Boer, P.A., Crossley, R.E., and Rothfield, L.I. (1989) A division inhibitor and a topological specificity factor coded for by the minicell locus determine proper placement of the division septum in *E. coli*. *Cell* **56**: 641–649.
- Gerding, M.A., Liu, B., Bendezú, F.O., Hale, C.A., Bernhardt, T.G., and de Boer, P.A.J. (2009) Self-enhanced accumulation of FtsN at Division Sites and Roles for Other Proteins with a SPOR domain (DamX, DedD, and RipA) in *Escherichia coli* cell constriction. *J Bacteriol* **191**: 7383–7401.
- Guyer, M.S., Reed, R.R., Steitz, J.A., and Low, K.B. (1981) Identification of a sex-factor-affinity site in *E. coli* as gamma delta. *Cold Spring Harb Symp Quant Biol* **45 Pt 1**: 135–140.
- Hale, C.A., and de Boer, P.A. (1999) Recruitment of ZipA to the septal ring of *Escherichia coli* is dependent on FtsZ and independent of FtsA. *J Bacteriol* **181**: 167–176.
- Peters, N.T., Dinh, T., and Bernhardt, T.G. (2011) A fail-safe mechanism in the septal ring assembly pathway generated by the sequential recruitment of cell separation amidases and their activators. *J Bacteriol* **193**: 4973–4983.
- Philippe, N., Alcaraz, J.-P., Coursange, E., Geiselmann, J., and Schneider, D. (2004) Improvement of pCVD442, a suicide plasmid for gene allele exchange in bacteria. *Plasmid* **51**: 246–255.

Uehara, T., Dinh, T., and Bernhardt, T.G. (2009) LytM-domain factors are required for daughter cell separation and rapid ampicillin-induced lysis in *Escherichia coli*. *J Bacteriol* **191**: 5094–5107.

Yang, D.C., Tan, K., Joachimiak, A., and Bernhardt, T.G. (2012) A conformational switch controls cell wall-remodelling enzymes required for bacterial cell division. *Mol Microbiol* **85**: 768–781.
